# Supplementary material
Source: MDPI journal article supplement (https://www.mdpi.com/2311-5637/8/10/490)
Supplement: s1 [file s1]

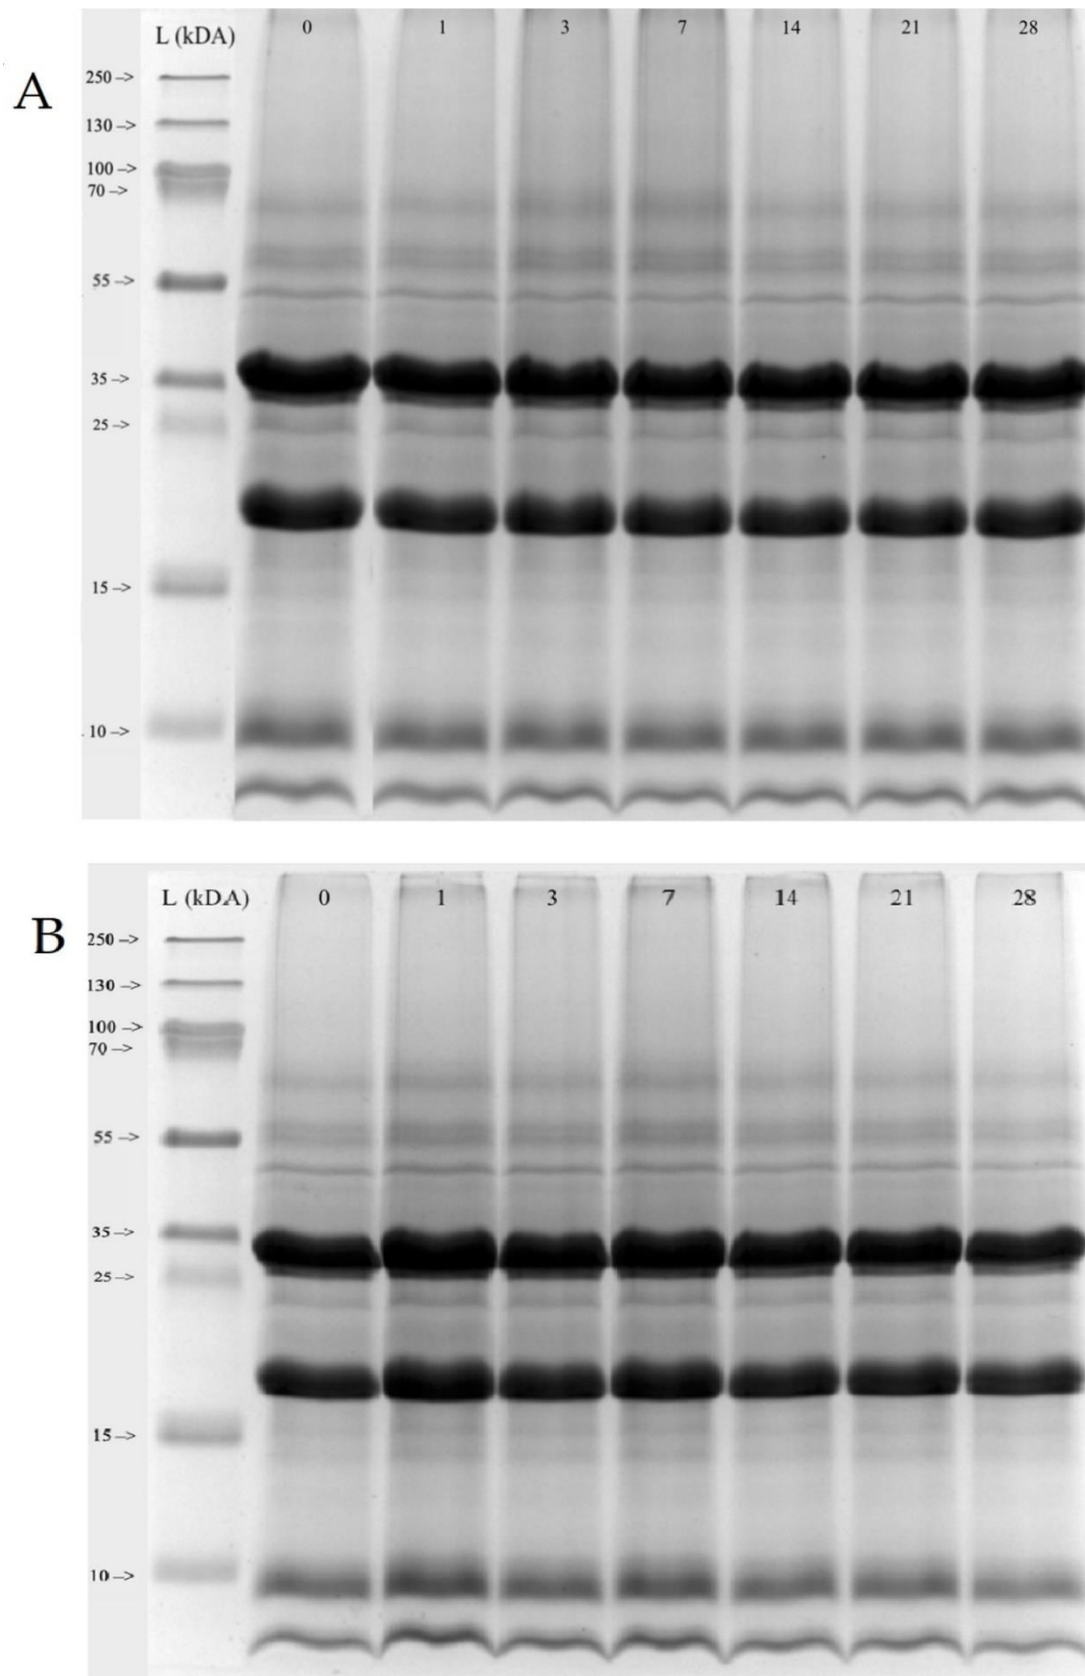

**Figure S1** SDS-PAGE Gels of A) HPC-Y B) HPC-K samples

**Table S1** Content of Free Amino Acids (%) in HPC Samples

|      |       | Time of storage (days) |       |       |       |       |       |       |
|------|-------|------------------------|-------|-------|-------|-------|-------|-------|
|      |       | 0                      | 1     | 5     | 7     | 14    | 21    | 28    |
| %    |       |                        |       |       |       |       |       |       |
| ASP  | HPC-K | 7.21                   | 4.65  | 4.52  | 4.96  | 5.60  | 5.63  | 5.74  |
|      | HPC-Y | 6.66                   | 6.83  | 8.07  | 8.51  | 7.41  | 8.14  | 7.72  |
| GLU  | HPC-K | 19.83                  | 13.76 | 14.32 | 13.63 | 16.54 | 15.97 | 15.92 |
|      | HPC-Y | 16.14                  | 9.89  | 1.96  | 2.47  | 2.21  | 2.29  | 2.15  |
| SER  | HPC-K | 7.32                   | 6.25  | 6.22  | 6.35  | 6.89  | 6.72  | 5.48  |
|      | HPC-Y | 6.55                   | 3.76  | 2.36  | 2.70  | 3.01  | 4.78  | 3.62  |
| GLY  | HPC-K | 2.25                   | 2.19  | 2.25  | 2.55  | 2.32  | 2.76  | 2.82  |
|      | HPC-Y | 1.93                   | 2.62  | 2.89  | 2.81  | 2.99  | 3.03  | 3.12  |
| HIS  | HPC-K | 0.59                   | 1.64  | 1.66  | 2.13  | 2.01  | 1.83  | 1.92  |
|      | HPC-Y | 0.64                   | 1.31  | 1.50  | 1.23  | 1.05  | 1.31  | 1.33  |
| ARG  | HPC-K | 3.98                   | 0.61  | 0.61  | 0.40  | 0.00  | 0.00  | 0.00  |
|      | HPC-Y | 4.24                   | 0.17  | 0.47  | 0.36  | 0.16  | 0.29  | 0.36  |
| THR  | HPC-K | 1.65                   | 1.08  | 0.98  | 0.97  | 1.06  | 0.68  | 0.51  |
|      | HPC-Y | 1.50                   | 0.80  | 1.14  | 1.36  | 0.97  | 0.99  | 0.84  |
| ALA  | HPC-K | 7.93                   | 6.19  | 6.59  | 6.85  | 7.65  | 5.99  | 7.64  |
|      | HPC-Y | 6.92                   | 6.97  | 7.62  | 9.19  | 7.62  | 7.51  | 7.36  |
| PRO  | HPC-K | 15.67                  | 22.35 | 21.39 | 21.65 | 19.34 | 20.68 | 21.95 |
|      | HPC-Y | 15.69                  | 23.50 | 26.39 | 19.32 | 21.92 | 20.19 | 19.28 |
| GABA | HPC-K | 11.65                  | 14.88 | 14.34 | 14.30 | 15.19 | 12.76 | 16.02 |
|      | HPC-Y | 12.01                  | 19.52 | 23.63 | 26.75 | 23.97 | 25.24 | 26.87 |
| TYR  | HPC-K | 2.73                   | 1.57  | 1.35  | 1.15  | 1.20  | 1.51  | 1.28  |
|      | HPC-Y | 2.82                   | 3.12  | 3.19  | 3.49  | 3.89  | 3.52  | 3.34  |
| VAL  | HPC-K | 2.80                   | 1.92  | 1.71  | 1.77  | 1.79  | 1.54  | 1.29  |
|      | HPC-Y | 2.74                   | 0.81  | 0.93  | 1.76  | 1.22  | 1.30  | 1.21  |
| MET  | HPC-K | 0.77                   | 0.18  | 0.17  | 0.18  | 0.17  | 0.12  | 0.18  |
|      | HPC-Y | 0.79                   | 0.21  | 0.22  | 0.27  | 0.79  | 0.71  | 0.71  |
| ILEU | HPC-K | 2.64                   | 2.08  | 2.24  | 2.02  | 2.10  | 2.07  | 1.48  |
|      | HPC-Y | 2.85                   | 1.33  | 1.31  | 1.67  | 0.95  | 1.47  | 1.23  |
| LEU  | HPC-K | 2.45                   | 3.18  | 4.39  | 4.73  | 4.15  | 3.88  | 3.56  |
|      | HPC-Y | 3.63                   | 3.31  | 3.47  | 4.60  | 4.31  | 3.85  | 3.81  |
| PHE  | HPC-K | 2.23                   | 3.17  | 2.69  | 2.63  | 2.15  | 2.09  | 1.51  |
|      | HPC-Y | 3.78                   | 3.18  | 3.77  | 4.00  | 4.10  | 3.47  | 6.94  |
| TRP  | HPC-K | 6.17                   | 8.88  | 8.68  | 8.23  | 7.67  | 9.19  | 7.98  |
|      | HPC-Y | 7.29                   | 9.01  | 6.64  | 4.57  | 9.06  | 8.24  | 6.45  |
| LYS  | HPC-K | 2.13                   | 5.40  | 5.88  | 5.51  | 4.17  | 6.56  | 4.71  |
|      | HPC-Y | 3.79                   | 3.64  | 4.45  | 4.93  | 4.38  | 3.68  | 3.67  |

**Table S2** Content of Free Amino Acids (mg/DM) in HPC Samples

|      |       | Time of storage (days) |             |             |             |             |             |             |
|------|-------|------------------------|-------------|-------------|-------------|-------------|-------------|-------------|
|      |       | 0                      | 1           | 5           | 7           | 14          | 21          | 28          |
|      |       | mg/g (DM)              |             |             |             |             |             |             |
| ASP  | HPC-K | 0.25 ± 0.01            | 0.14 ± 0.01 | 0.14 ± 0.00 | 0.16 ± 0.02 | 0.19 ± 0.00 | 0.24 ± 0.00 | 0.18 ± 0.01 |
|      | HPC-Y | 0.24 ± 0.01            | 0.17 ± 0.00 | 0.22 ± 0.01 | 0.19 ± 0.00 | 0.18 ± 0.00 | 0.19 ± 0.00 | 0.16 ± 0.00 |
| GLU  | HPC-K | 0.69 ± 0.04            | 0.42 ± 0.00 | 0.46 ± 0.00 | 0.45 ± 0.03 | 0.56 ± 0.00 | 0.68 ± 0.02 | 0.50 ± 0.02 |
|      | HPC-Y | 0.58 ± 0.00            | 0.24 ± 0.00 | 0.05 ± 0.00 | 0.05 ± 0.00 | 0.05 ± 0.00 | 0.05 ± 0.00 | 0.04 ± 0.00 |
| SER  | HPC-K | 0.25 ± 0.01            | 0.19 ± 0.01 | 0.20 ± 0.00 | 0.21 ± 0.03 | 0.23 ± 0.00 | 0.29 ± 0.01 | 0.17 ± 0.00 |
|      | HPC-Y | 0.23 ± 0.00            | 0.09 ± 0.00 | 0.06 ± 0.01 | 0.06 ± 0.01 | 0.07 ± 0.01 | 0.11 ± 0.01 | 0.07 ± 0.00 |
| GLY  | HPC-K | 0.08 ± 0.01            | 0.07 ± 0.00 | 0.07 ± 0.00 | 0.08 ± 0.02 | 0.08 ± 0.00 | 0.12 ± 0.00 | 0.09 ± 0.01 |
|      | HPC-Y | 0.07 ± 0.00            | 0.06 ± 0.00 | 0.08 ± 0.01 | 0.06 ± 0.00 | 0.07 ± 0.00 | 0.07 ± 0.00 | 0.06 ± 0.01 |
| HIS  | HPC-K | 0.02 ± 0.00            | 0.05 ± 0.00 | 0.05 ± 0.00 | 0.07 ± 0.02 | 0.07 ± 0.01 | 0.08 ± 0.01 | 0.06 ± 0.00 |
|      | HPC-Y | 0.02 ± 0.00            | 0.03 ± 0.00 | 0.04 ± 0.01 | 0.03 ± 0.00 | 0.03 ± 0.00 | 0.03 ± 0.00 | 0.03 ± 0.00 |
| ARG  | HPC-K | 0.14 ± 0.01            | 0.02 ± 0.00 | 0.02 ± 0.00 | 0.01 ± 0.00 | 0.00 ± 0.00 | 0.00 ± 0.00 | 0.00 ± 0.00 |
|      | HPC-Y | 0.15 ± 0.01            | 0.00 ± 0.00 | 0.01 ± 0.00 | 0.01 ± 0.00 | 0.00 ± 0.00 | 0.01 ± 0.00 | 0.01 ± 0.00 |
| THR  | HPC-K | 0.06 ± 0.01            | 0.03 ± 0.00 | 0.03 ± 0.00 | 0.03 ± 0.00 | 0.04 ± 0.00 | 0.03 ± 0.00 | 0.02 ± 0.00 |
|      | HPC-Y | 0.05 ± 0.01            | 0.02 ± 0.00 | 0.03 ± 0.00 | 0.03 ± 0.00 | 0.02 ± 0.00 | 0.02 ± 0.00 | 0.02 ± 0.00 |
| ALA  | HPC-K | 0.27 ± 0.02            | 0.19 ± 0.00 | 0.21 ± 0.00 | 0.23 ± 0.02 | 0.26 ± 0.01 | 0.26 ± 0.00 | 0.24 ± 0.01 |
|      | HPC-Y | 0.25 ± 0.01            | 0.17 ± 0.01 | 0.21 ± 0.00 | 0.20 ± 0.00 | 0.18 ± 0.01 | 0.17 ± 0.01 | 0.15 ± 0.00 |
| PRO  | HPC-K | 0.54 ± 0.01            | 0.68 ± 0.02 | 0.68 ± 0.00 | 0.71 ± 0.04 | 0.65 ± 0.03 | 0.88 ± 0.01 | 0.69 ± 0.03 |
|      | HPC-Y | 0.56 ± 0.01            | 0.57 ± 0.00 | 0.71 ± 0.03 | 0.43 ± 0.03 | 0.53 ± 0.00 | 0.46 ± 0.01 | 0.40 ± 0.00 |
| GABA | HPC-K | 0.40 ± 0.01            | 0.45 ± 0.01 | 0.46 ± 0.00 | 0.47 ± 0.03 | 0.51 ± 0.01 | 0.54 ± 0.01 | 0.50 ± 0.02 |
|      | HPC-Y | 0.43 ± 0.00            | 0.48 ± 0.01 | 0.64 ± 0.02 | 0.59 ± 0.01 | 0.58 ± 0.00 | 0.58 ± 0.01 | 0.55 ± 0.01 |
| TYR  | HPC-K | 0.09 ± 0.01            | 0.05 ± 0.01 | 0.04 ± 0.00 | 0.04 ± 0.00 | 0.04 ± 0.00 | 0.06 ± 0.00 | 0.04 ± 0.01 |
|      | HPC-Y | 0.10 ± 0.00            | 0.08 ± 0.00 | 0.09 ± 0.00 | 0.08 ± 0.01 | 0.09 ± 0.00 | 0.08 ± 0.00 | 0.07 ± 0.00 |
| VAL  | HPC-K | 0.10 ± 0.01            | 0.06 ± 0.00 | 0.05 ± 0.00 | 0.06 ± 0.01 | 0.06 ± 0.01 | 0.07 ± 0.00 | 0.04 ± 0.00 |
|      | HPC-Y | 0.10 ± 0.00            | 0.02 ± 0.00 | 0.03 ± 0.00 | 0.04 ± 0.00 | 0.03 ± 0.00 | 0.03 ± 0.00 | 0.02 ± 0.00 |
| MET  | HPC-K | 0.03 ± 0.00            | 0.01 ± 0.00 | 0.01 ± 0.00 | 0.01 ± 0.00 | 0.01 ± 0.00 | 0.01 ± 0.00 | 0.01 ± 0.00 |
|      | HPC-Y | 0.03 ± 0.00            | 0.01 ± 0.00 | 0.01 ± 0.00 | 0.01 ± 0.00 | 0.02 ± 0.00 | 0.02 ± 0.00 | 0.01 ± 0.00 |
| ILEU | HPC-K | 0.09 ± 0.01            | 0.06 ± 0.01 | 0.07 ± 0.00 | 0.07 ± 0.00 | 0.07 ± 0.00 | 0.09 ± 0.00 | 0.05 ± 0.00 |
|      | HPC-Y | 0.10 ± 0.01            | 0.03 ± 0.00 | 0.04 ± 0.00 | 0.04 ± 0.00 | 0.02 ± 0.00 | 0.03 ± 0.00 | 0.03 ± 0.00 |
| LEU  | HPC-K | 0.08 ± 0.01            | 0.10 ± 0.01 | 0.14 ± 0.00 | 0.16 ± 0.02 | 0.14 ± 0.00 | 0.17 ± 0.01 | 0.11 ± 0.01 |
|      | HPC-Y | 0.13 ± 0.00            | 0.08 ± 0.00 | 0.09 ± 0.01 | 0.10 ± 0.00 | 0.10 ± 0.00 | 0.09 ± 0.00 | 0.08 ± 0.00 |
| PHE  | HPC-K | 0.08 ± 0.01            | 0.10 ± 0.01 | 0.09 ± 0.01 | 0.09 ± 0.01 | 0.07 ± 0.00 | 0.09 ± 0.00 | 0.05 ± 0.00 |
|      | HPC-Y | 0.14 ± 0.01            | 0.08 ± 0.00 | 0.10 ± 0.01 | 0.09 ± 0.00 | 0.10 ± 0.01 | 0.08 ± 0.01 | 0.14 ± 0.00 |
| TRP  | HPC-K | 0.21 ± 0.02            | 0.27 ± 0.02 | 0.28 ± 0.02 | 0.27 ± 0.02 | 0.26 ± 0.01 | 0.39 ± 0.02 | 0.25 ± 0.00 |
|      | HPC-Y | 0.26 ± 0.00            | 0.22 ± 0.01 | 0.18 ± 0.02 | 0.10 ± 0.00 | 0.22 ± 0.00 | 0.19 ± 0.01 | 0.13 ± 0.01 |
| LYS  | HPC-K | 0.07 ± 0.01            | 0.16 ± 0.01 | 0.19 ± 0.00 | 0.18 ± 0.03 | 0.14 ± 0.02 | 0.28 ± 0.01 | 0.15 ± 0.00 |
|      | HPC-Y | 0.14 ± 0.00            | 0.09 ± 0.01 | 0.12 ± 0.01 | 0.11 ± 0.00 | 0.11 ± 0.00 | 0.08 ± 0.01 | 0.08 ± 0.00 |
